# Supplementary material
Source: Copernicus journal article supplement (doi:10.5194/egusphere-2026-1378)
Supplement: Supplementary file 1 [file egusphere-2026-1378-supplement.pdf]

## Supplementary Materials

Table S1: Catchment-Scale MAR Potential.

| Site       | Approach 1 |             | Approach 12 |             |
|------------|------------|-------------|-------------|-------------|
|            | Mean       | Max.        | Mean        | Max.        |
| 2          | 1.6        | 3.8         | 2           | 6           |
| 6          | 1.2        | 2.8         | 1.1         | 3.4         |
| 12         | 4.4        | 7.6         | 3.2         | 10          |
| 13         | 1.1        | 3.7         | 0.9         | 3           |
| 14         | 0.5        | 2.9         | 0           | 0           |
| 15         | 1          | 1.3         | 0.5         | 1.4         |
| 16         | 1.6        | 2.5         | 1.3         | 3.1         |
| 18         | 0.4        | 1.1         | 0.6         | 2.5         |
| 19         | 0.8        | 3.2         | 0.8         | 4.4         |
| 21         | 6.2        | 9           | 3.9         | 10.8        |
| 22         | 1.5        | 2.6         | 1.2         | 3.6         |
| 23         | 0.9        | 1.7         | 0.7         | 3           |
| 24         | 0.4        | 0.7         | 0.6         | 1.5         |
| 25         | 1.6        | 3.2         | 1.6         | 5.5         |
| 26         | 0.6        | 1.6         | 0.6         | 3           |
| 27         | 1.1        | 3.1         | 1.2         | 3.7         |
| <b>Sum</b> | <b>23</b>  | <b>49.8</b> | <b>18.2</b> | <b>61.9</b> |

Note: Recharge volume units are expressed in million cubic metres (Mm<sup>3</sup>).

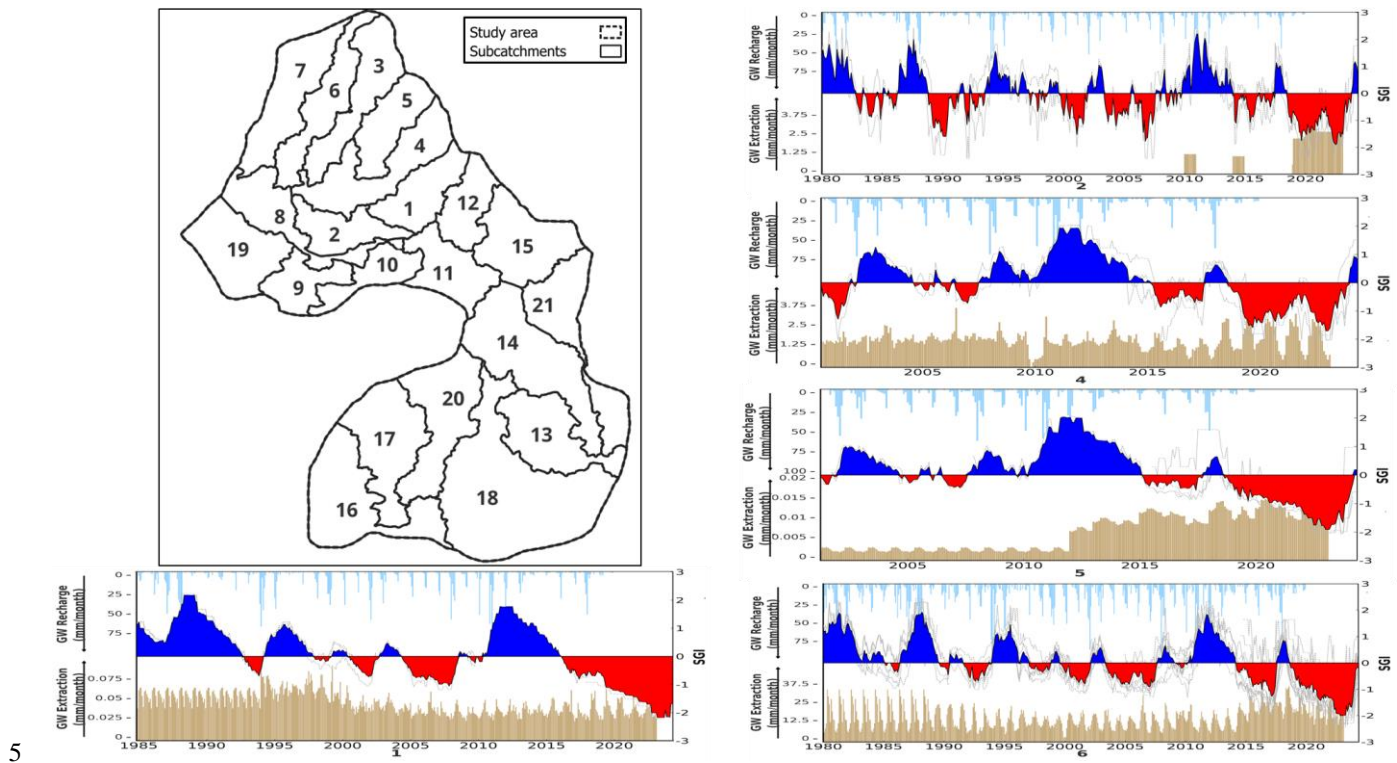

Figure S1. SGI time series of sub-catchments (1, 2, 4, 5, and 6).

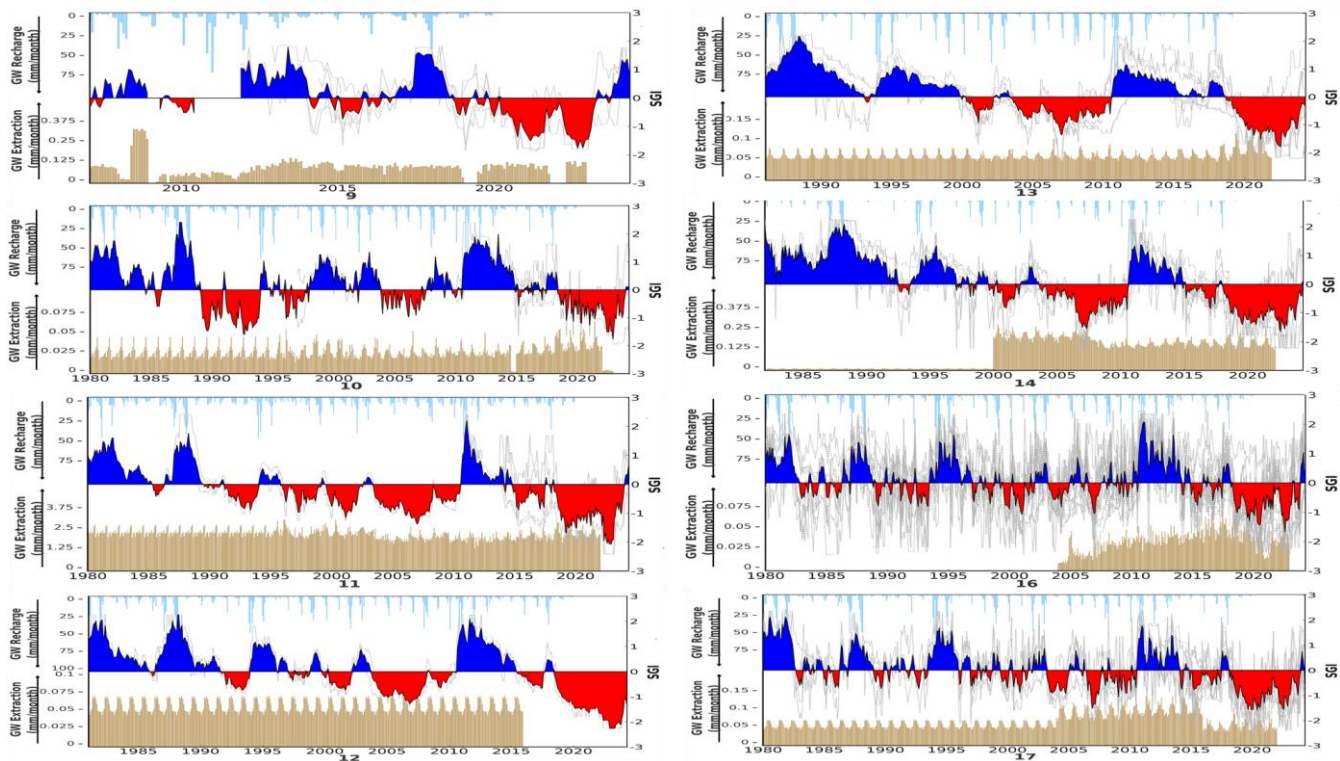

Figure S2. SGI time series of sub-catchments (9, 10, 11, 12, 13, 14, 16, and 17).

10

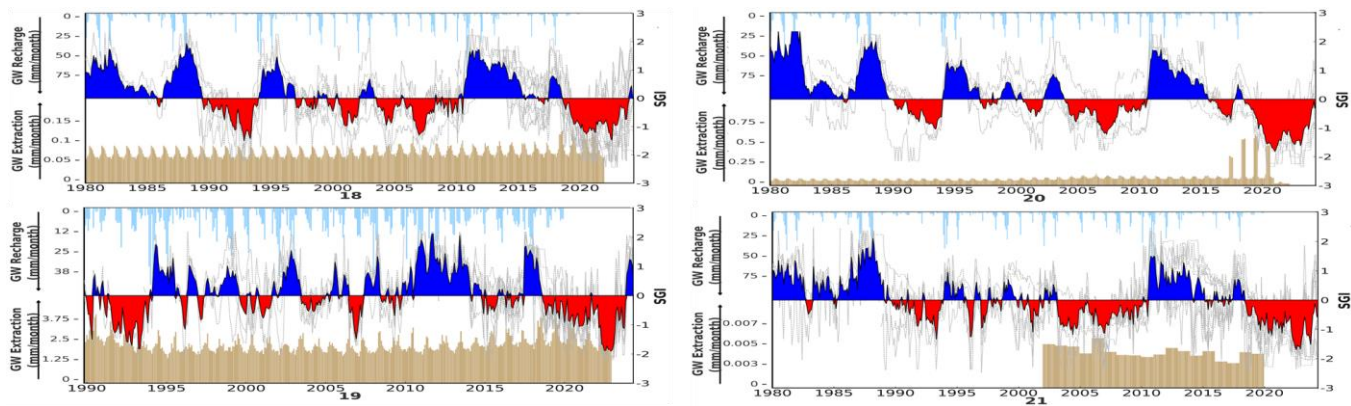

Figure S3. SGI time series of sub-catchments (18, 19, 20, and 21).

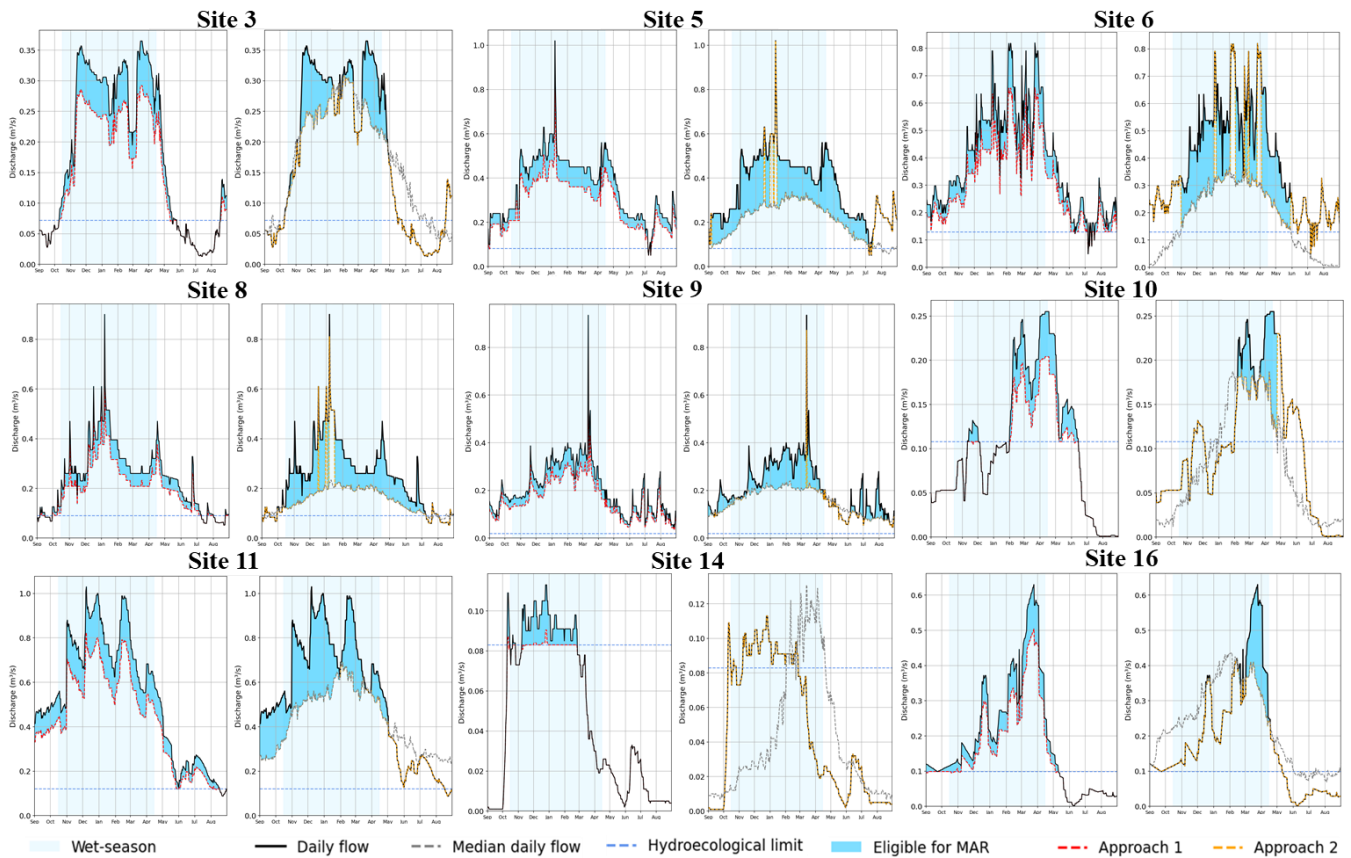

15 Figure S4. Hydrographs with daily flow, ecological thresholds, and MAR-eligible windows (blue shading) at Sites 3, 5, 6, 8, 9, 10, 11, 14, and 16; dashed red = Approach 1 (20% rule), dashed orange = Approach 2 (multi-threshold).

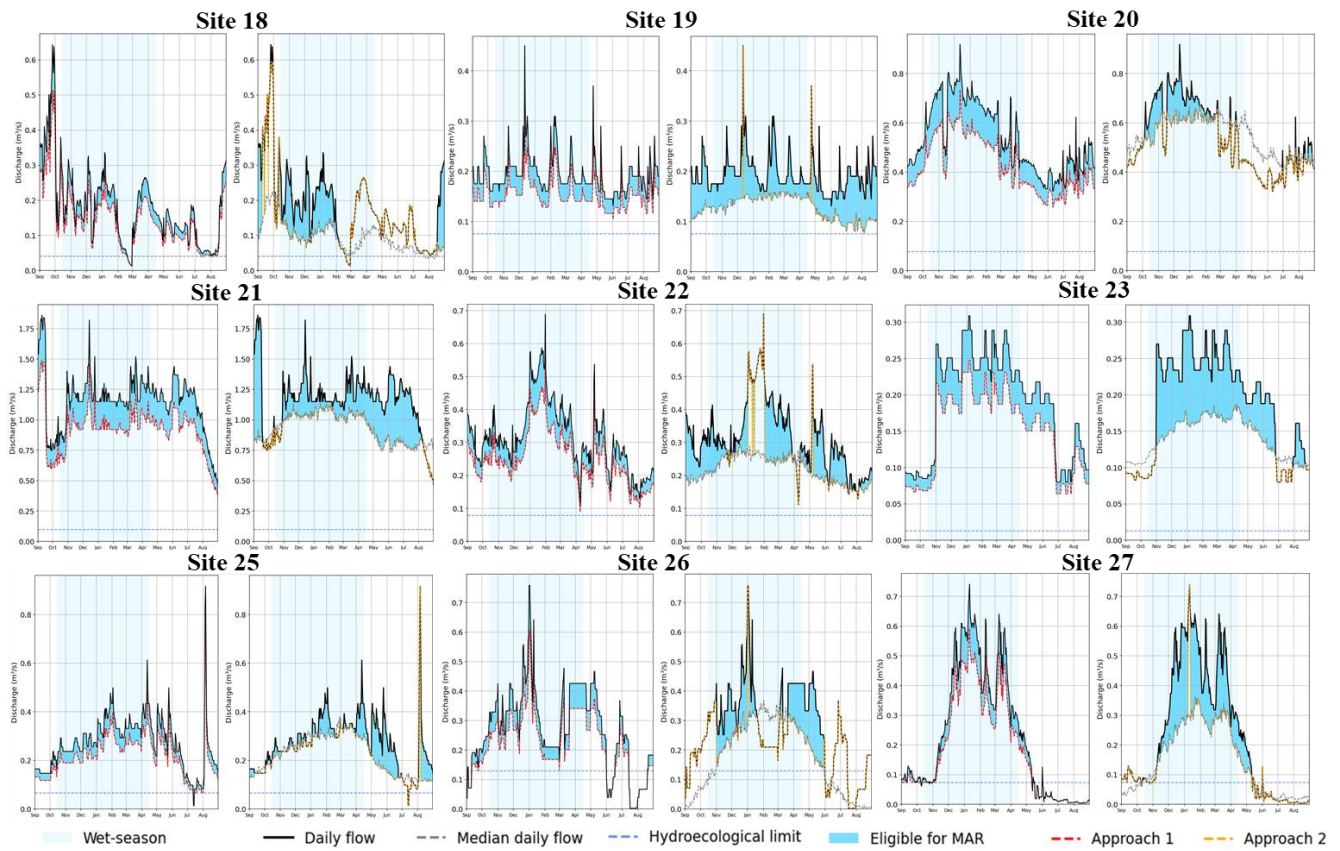

Figure S5. Hydrographs with daily flow, ecological thresholds, and MAR-eligible windows (blue shading) at Sites 18, 19, 20, 21, 22, 23, 25, 26, and 27; dashed red = Approach 1 (20% rule), dashed orange = Approach 2 (multi-threshold).

### Approach 1

### Approach 2

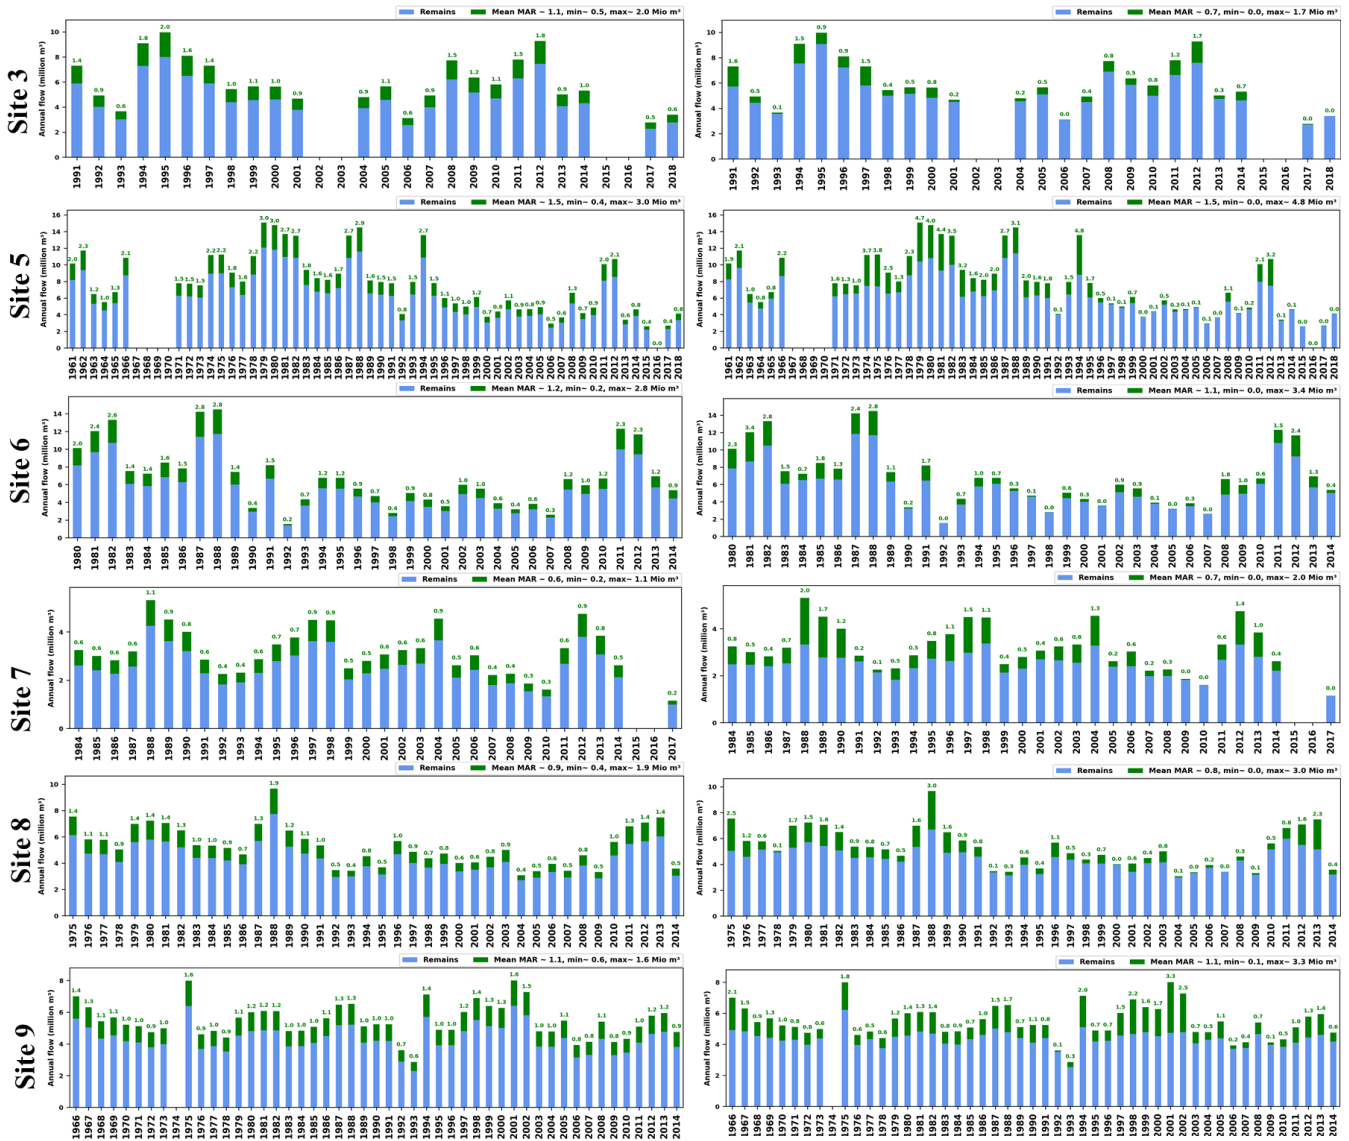

Figure S6. Seasonal discharge regimes and MAR eligibility for Sites 1, 2, 4, 12, 13, and 15 under both approaches, illustrating frequent eligibility under Approach 1 versus event-focused eligibility under Approach 2.

### Approach 1

### Approach 2

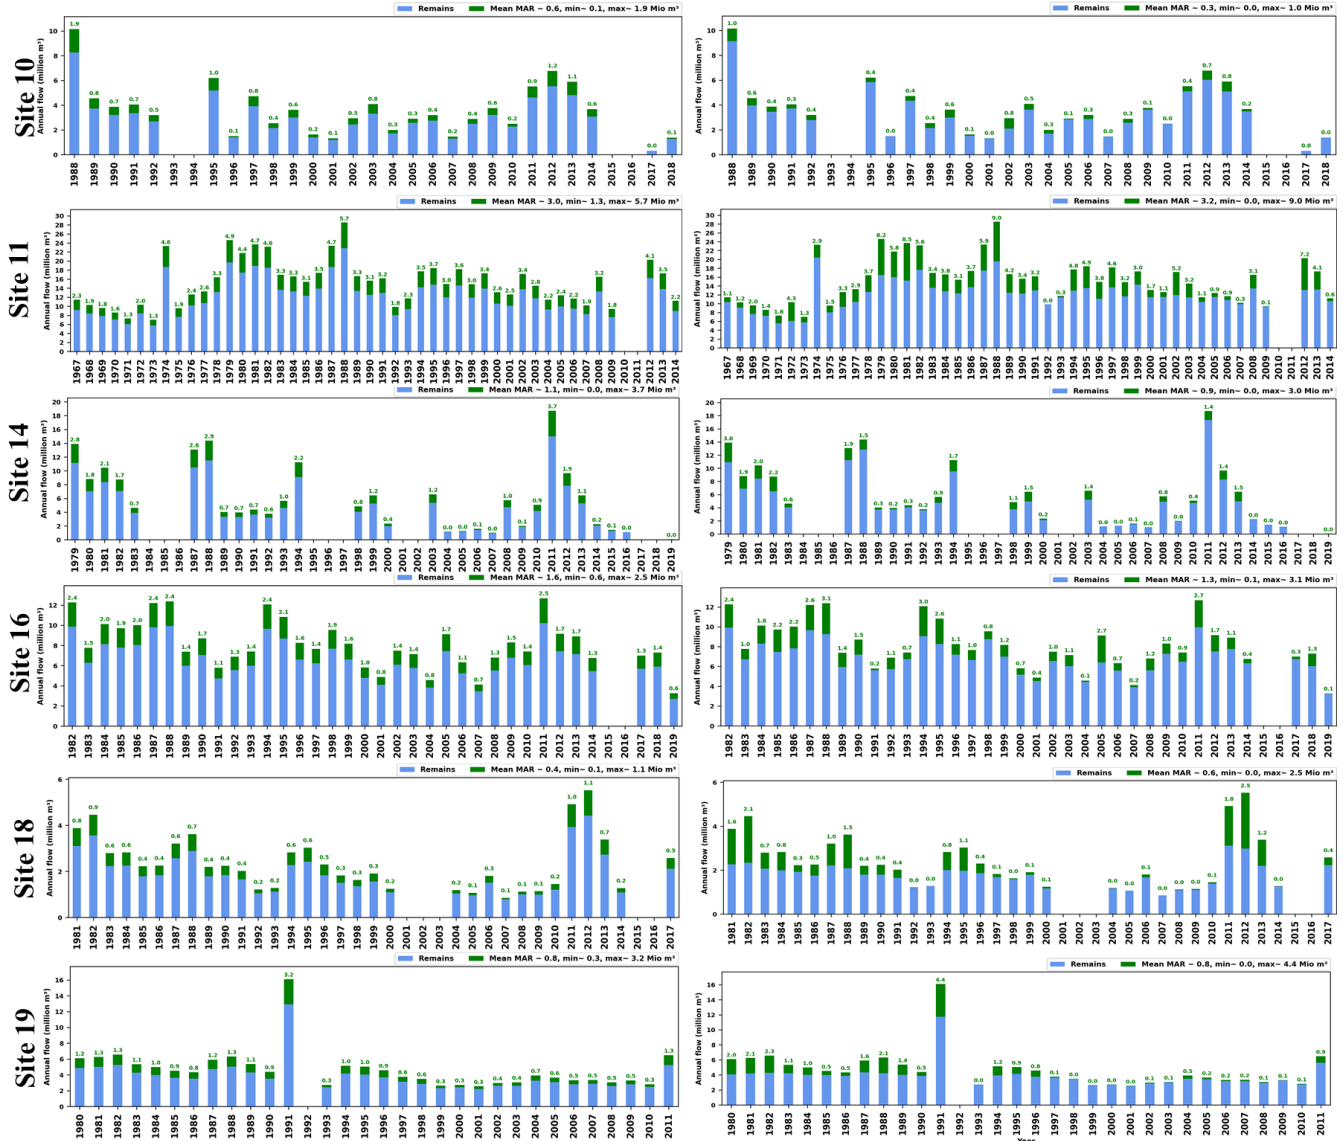

30 Figure S7. Seasonal discharge regimes and MAR eligibility for Sites 1, 2, 4, 12, 13, and 15 under both approaches, illustrating frequent eligibility under Approach 1 versus event-focused eligibility under Approach 2.

### Approach 1

### Approach 2

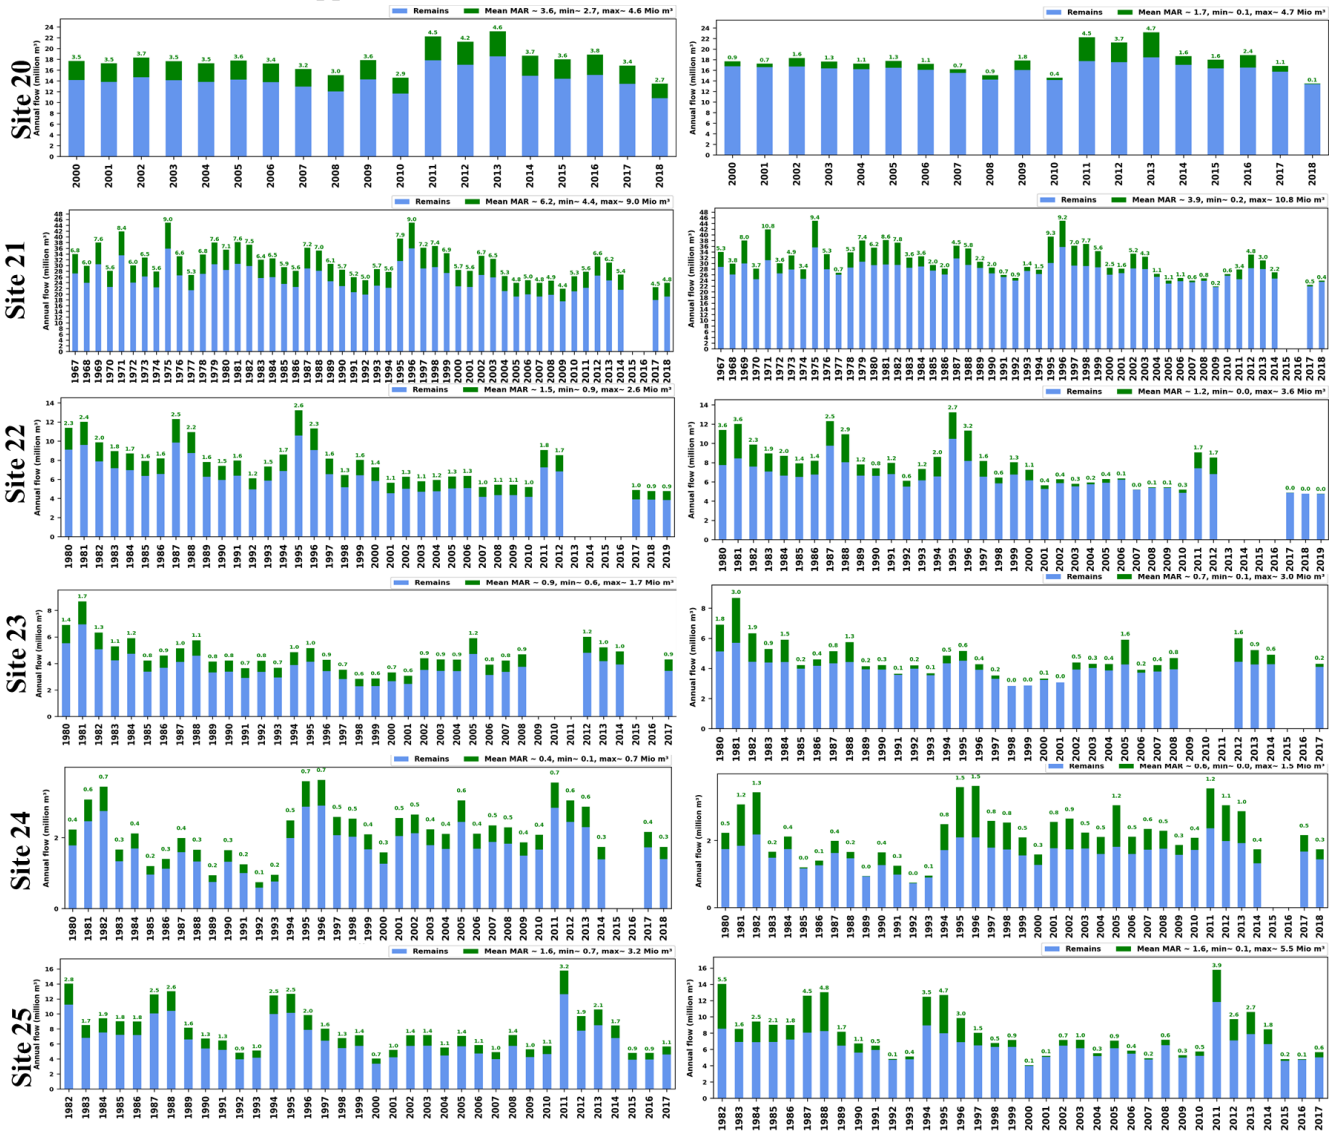

35 Figure S8. Seasonal discharge regimes and MAR eligibility for Sites 1, 2, 4, 12, 13, and 15 under both approaches, illustrating frequent eligibility under Approach 1 versus event-focused eligibility under Approach 2.
